26. Fukumoto J, Harada C, Kawaguchi T, Suetsugu S, Maeyama T, Inoshima I, Hamada N, Kuwano K, Nakanishi Y: Amphiregulin attenuates bleomycin-induced pneumopathy in mice. *Am J Physiol Lung Cell Mol Physiol* 2010; 298:L131–8
27. Kawasaki M, Kuwano K, Hagimoto N, Matsuba T, Kunitake R, Tanaka T, Maeyama T, Hara N: Protection from lethal apoptosis in lipopolysaccharide-induced acute lung injury in mice by a caspase inhibitor. *Am J Pathol* 2000; 157:597–603
28. Rudkowski JC, Barreiro E, Harfouche R, Goldberg P, Kishta O, D'Orleans-Juste P, Labonte J, Lesur O, Hussain SN: Roles of iNOS and nNOS in sepsis-induced pulmonary apoptosis. *Am J Physiol Lung Cell Mol Physiol* 2004; 286:L793–800
29. Albertine KH, Soulier MF, Wang Z, Ishizaka A, Hashimoto S, Zimmerman GA, Matthay MA, Ware LB: Fas and fas ligand are up-regulated in pulmonary edema fluid and lung tissue of patients with acute lung injury and the acute respiratory distress syndrome. *Am J Pathol* 2002; 161:1783–96
30. Avraham R, Yarden Y: Feedback regulation of EGFR signaling: Decision making by early and delayed loops. *Nat Rev Mol Cell Biol* 2011; 12:104–17
31. Westphalen K, Gusarova GA, Islam MN, Subramanian M, Cohen TS, Prince AS, Bhattacharya J: Sessile alveolar macrophages communicate with alveolar epithelium to modulate immunity. *Nature* 2014; 506:503–6

## ANESTHESIOLOGY REFLECTIONS FROM THE WOOD LIBRARY-MUSEUM

Portrayed by Peale, Would “Apoplexy” Haunt Colton’s Near-asphyxial Anesthetics?

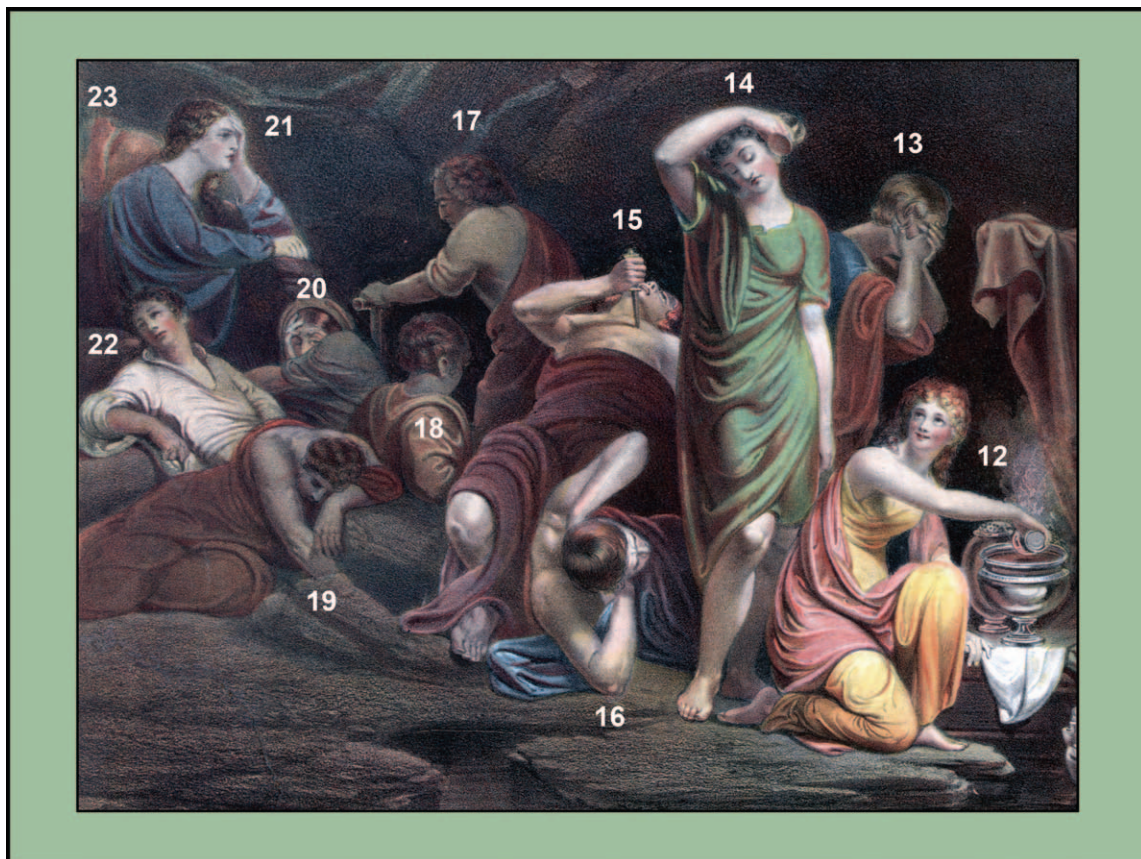

By mass-producing chromolithographs of *The Court of Death*, an allegorical painting by Rembrandt Peale (1778–1860), nitrous oxide pioneer Gardner Q. Colton (1814–1898) hoped to decorate 100,000 American homes with this “parlor ornament.” On the left third of Colton’s print of Peale’s painting, a closer view (*above*) reveals sensual Pleasure (12) and Intemperance (14), which Peale associated with Gout (17), Fever (22), and Delirium Tremens (16). Of course, Pleasure and Intemperance were also linked with mental afflictions ranging from Hypochondria (20), Remorse (13), and Despair (23) to Suicide (15). Accumulating products of self-destructive behaviors could congest the lungs, the heart, or the brain and were depicted by Peale as Consumption (21), Dropsy (18), and Apoplexy (19), respectively. Hypoxic brain damage, often manifesting as apoplexy or stroke, would afflict patients, possibly hundreds of them, over the century following Colton’s 1863 revival of using unoxygenated nitrous oxide for dental anesthesia. (Copyright © the American Society of Anesthesiologists, Inc.)

George S. Bause, M.D., M.P.H., Honorary Curator, ASA’s Wood Library-Museum of Anesthesiology, Schaumburg, Illinois, and Clinical Associate Professor, Case Western Reserve University, Cleveland, Ohio. UJYC@aol.com.
